# Supplementary material for: Unveiling the long-term degradation mechanisms of the sealing structures for durable PEM fuel cells by ex situ accelerated stability evaluation of a membrane electrode assembly
Source: Royal Society of Chemistry journal article supplement (doi:10.1039/d4ta03998j), 2024-01-01
Supplement: d4ta03998j1.pdf [file d4ta03998j1.pdf]

## **Supplementary data**

### **Unveiling the long-term degradation mechanisms of the sealing structures for durable PEM fuel cells by ex-situ accelerated stability evaluation of a membrane electrode assembly**

Jin-Wook Kim<sup>†</sup>, Sooyoung Yang<sup>†</sup>, Gyu Jin Shin, Min Jeong Oh, Keumjung Lee, and Jun Hyup Lee\*

*Department of Chemical Engineering, Soongsil University, Seoul 06978, Republic of Korea*

<sup>†</sup>These authors contributed equally to this work.

\*Corresponding author. Email: junhyuplee@ssu.ac.kr

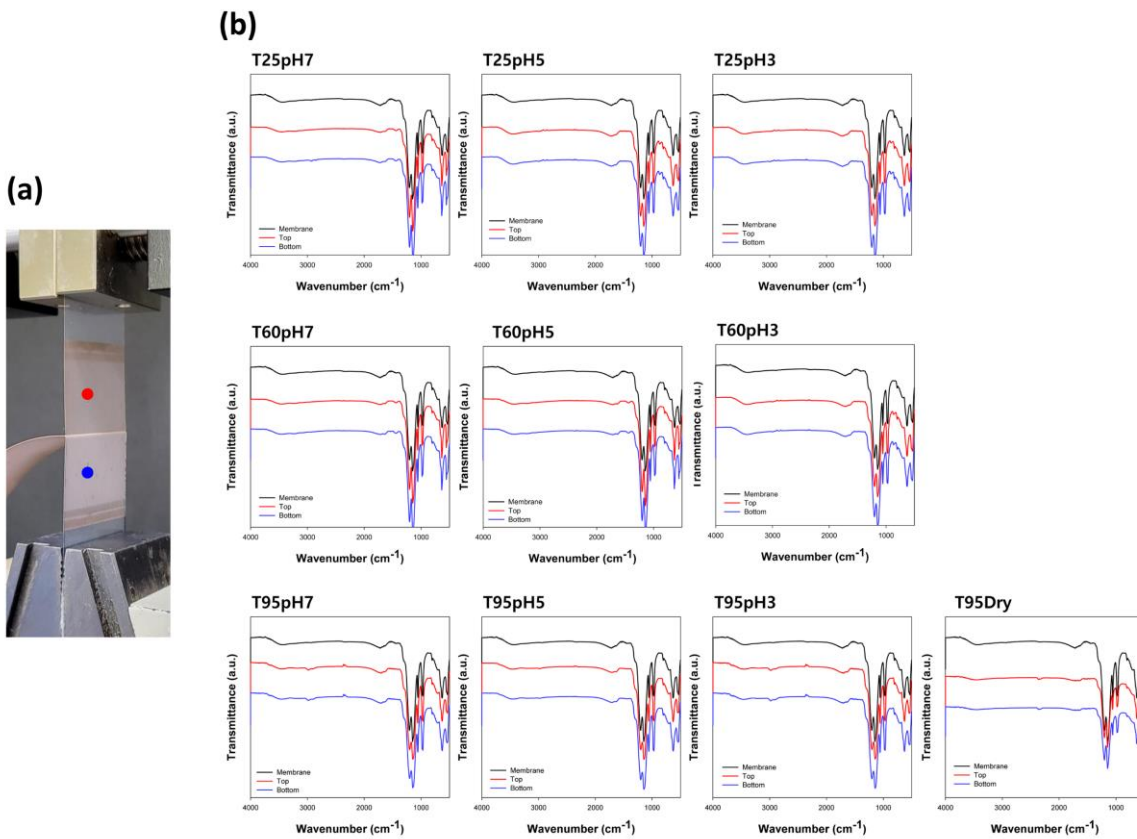

**Fig. S1.** (a) Photographic image of 180° T-peel test. (b) FT-IR Spectra of the upper and lower surfaces of the peeled MEA frame films according to the different acceleration environments.

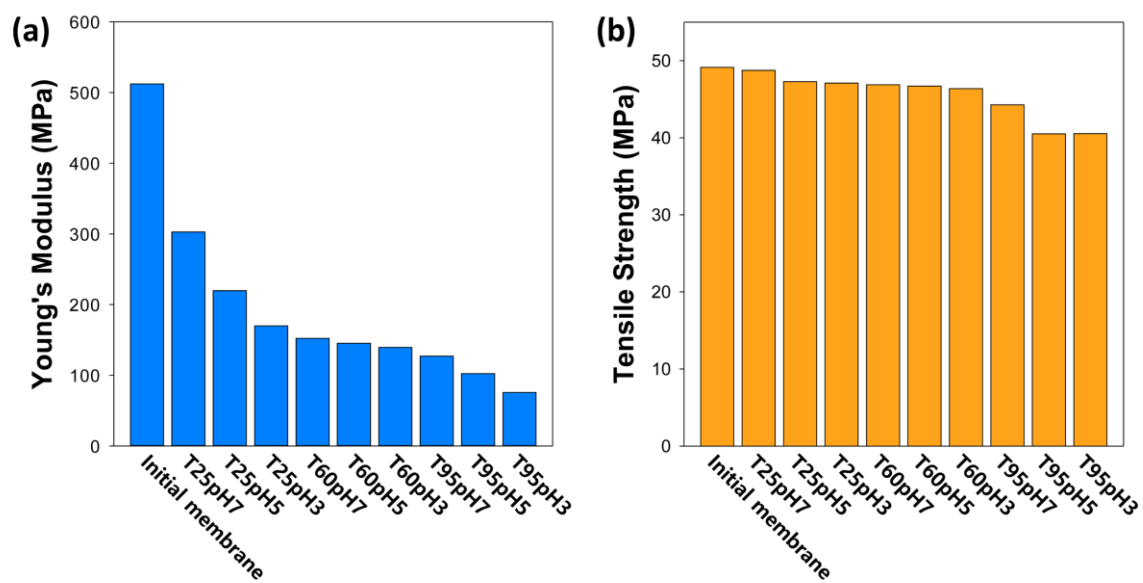

**Fig. S2.** (a) Young's modulus and (b) tensile strength of the Nafion membrane films after accelerated evaluation for 504 h under two-factor, three-level conditions.

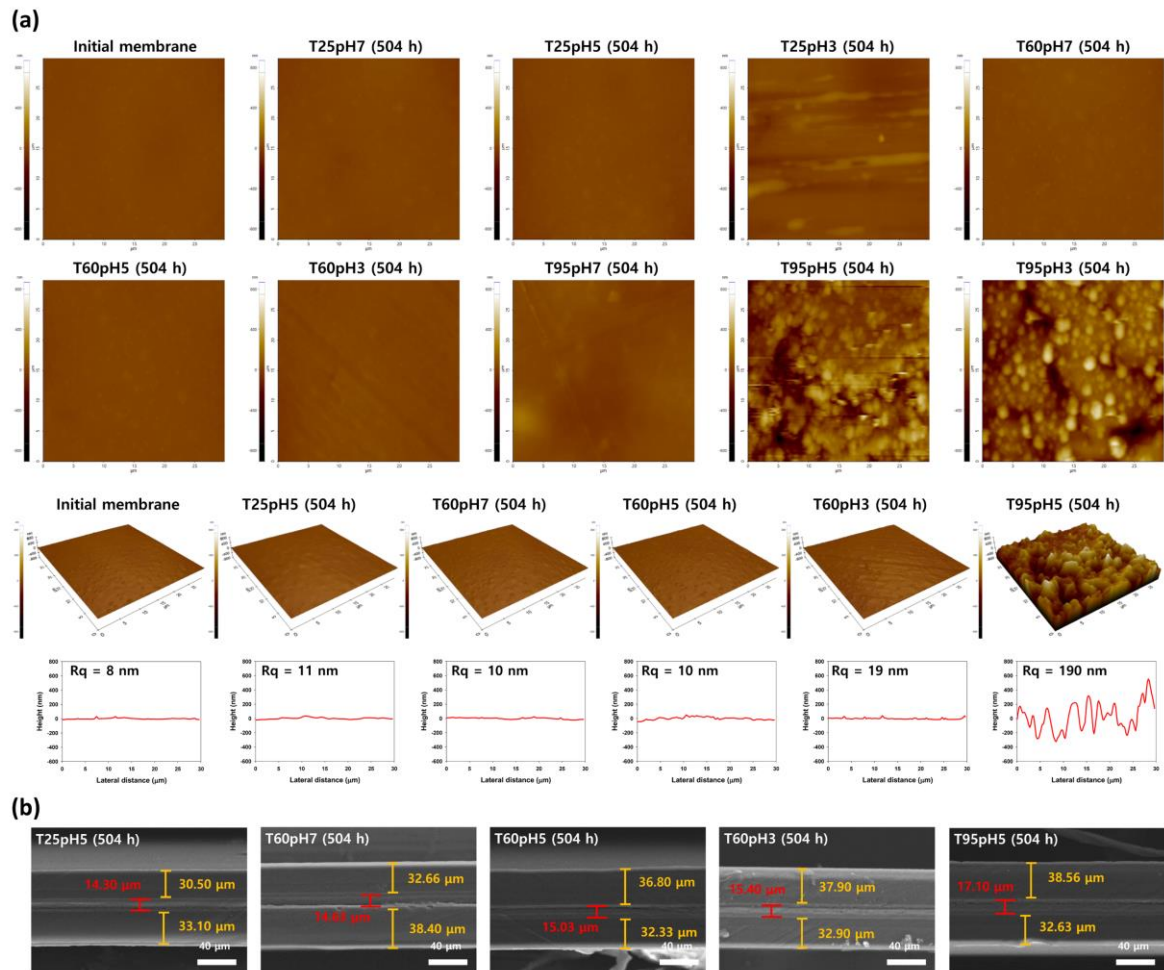

**Fig. S3.** (a) AFM images of membrane surfaces and (b) cross-sectional FE-SEM images of the MEA frame films after accelerated evaluation for 504 h under two-factor, three-level conditions.

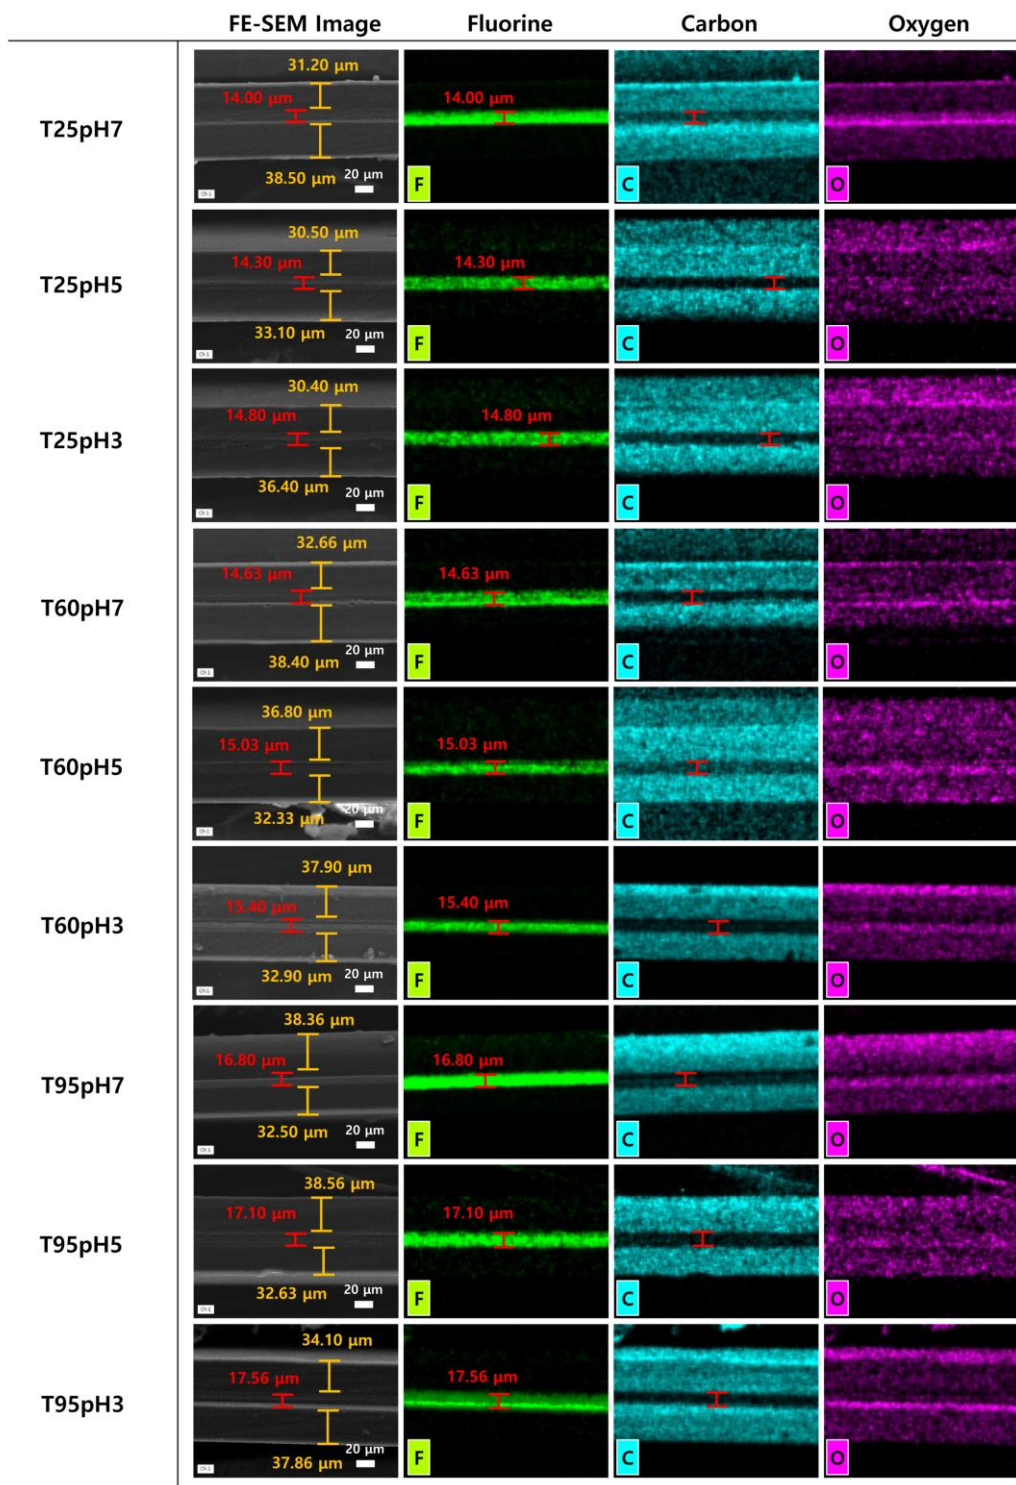

**Fig. S4.** Cross-sectional FE-SEM and EDS images of the MEA frame films after accelerated evaluation for 504 h under two-factor, three-level conditions.

**Table S1.** Peel strengths of the MEA frame films after two-factor, three-level experiment

| Sample | Peel Strength (N/mm)    |                      |                      |                      |                      |                      |
|--------|-------------------------|----------------------|----------------------|----------------------|----------------------|----------------------|
|        | Initial<br>(0 h)        | 1 h                  | 3 h                  | 6 h                  | 12 h                 | 18 h                 |
|        |                         | 24 h                 | 72 h                 | 168 h                | 336 h                | 504 h                |
| T25pH7 | 0.22<br>( $\pm 0.010$ ) | 0.22 ( $\pm 0.012$ ) | 0.23 ( $\pm 0.009$ ) | 0.22 ( $\pm 0.007$ ) | 0.25 ( $\pm 0.011$ ) | 0.23 ( $\pm 0.007$ ) |
|        |                         | 0.22 ( $\pm 0.010$ ) | 0.20 ( $\pm 0.030$ ) | 0.21 ( $\pm 0.01$ )  | 0.19 ( $\pm 0.01$ )  | 0.18 ( $\pm 0.004$ ) |
| T25pH5 | 0.21<br>( $\pm 0.010$ ) | 0.22 ( $\pm 0.013$ ) | 0.22 ( $\pm 0.004$ ) | 0.20 ( $\pm 0.012$ ) | 0.21 ( $\pm 0.006$ ) | 0.21 ( $\pm 0.011$ ) |
|        |                         | 0.20 ( $\pm 0.010$ ) | 0.20 ( $\pm 0.020$ ) | 0.19 ( $\pm 0.010$ ) | 0.17 ( $\pm 0.005$ ) | 0.19 ( $\pm 0.010$ ) |
| T25pH3 | 0.20<br>( $\pm 0.007$ ) | 0.26 ( $\pm 0.005$ ) | 0.19 ( $\pm 0.006$ ) | 0.18 ( $\pm 0.011$ ) | 0.19 ( $\pm 0.020$ ) | 0.19 ( $\pm 0.005$ ) |
|        |                         | 0.20 ( $\pm 0.009$ ) | 0.18 ( $\pm 0.007$ ) | 0.18 ( $\pm 0.010$ ) | 0.17 ( $\pm 0.005$ ) | 0.16 ( $\pm 0.009$ ) |
| T60pH7 | 0.21<br>( $\pm 0.010$ ) | 0.26 ( $\pm 0.009$ ) | 0.20 ( $\pm 0.019$ ) | 0.22 ( $\pm 0.013$ ) | 0.20 ( $\pm 0.006$ ) | 0.19 ( $\pm 0.005$ ) |
|        |                         | 0.20 ( $\pm 0.010$ ) | 0.17 ( $\pm 0.010$ ) | 0.14 ( $\pm 0.010$ ) | 0.13 ( $\pm 0.020$ ) | 0.12 ( $\pm 0.020$ ) |
| T60pH5 | 0.24<br>( $\pm 0.002$ ) | 0.24 ( $\pm 0.018$ ) | 0.21 ( $\pm 0.001$ ) | 0.17 ( $\pm 0.016$ ) | 0.18 ( $\pm 0.007$ ) | 0.17 ( $\pm 0.006$ ) |
|        |                         | 0.14 ( $\pm 0.009$ ) | 0.13 ( $\pm 0.006$ ) | 0.13 ( $\pm 0.014$ ) | 0.12 ( $\pm 0.005$ ) | 0.12 ( $\pm 0.003$ ) |
| T60pH3 | 0.26<br>( $\pm 0.016$ ) | 0.19 ( $\pm 0.007$ ) | 0.18 ( $\pm 0.008$ ) | 0.18 ( $\pm 0.009$ ) | 0.18 ( $\pm 0.010$ ) | 0.17 ( $\pm 0.010$ ) |
|        |                         | 0.13 ( $\pm 0.006$ ) | 0.13 ( $\pm 0.003$ ) | 0.12 ( $\pm 0.010$ ) | 0.12 ( $\pm 0.014$ ) | 0.12 ( $\pm 0.002$ ) |
| T95pH7 | 0.27<br>( $\pm 0.030$ ) | 0.20 ( $\pm 0.026$ ) | 0.21 ( $\pm 0.023$ ) | 0.19 ( $\pm 0.011$ ) | 0.16 ( $\pm 0.013$ ) | 0.14 ( $\pm 0.014$ ) |
|        |                         | 0.11 ( $\pm 0.010$ ) | 0.09 ( $\pm 0.022$ ) | 0.11 ( $\pm 0.021$ ) | 0.07 ( $\pm 0.007$ ) | 0.09 ( $\pm 0.01$ )  |
| T95pH5 | 0.24<br>( $\pm 0.005$ ) | 0.17 ( $\pm 0.036$ ) | 0.16 ( $\pm 0.011$ ) | 0.16 ( $\pm 0.024$ ) | 0.13 ( $\pm 0.019$ ) | 0.12 ( $\pm 0.043$ ) |
|        |                         | 0.10 ( $\pm 0.001$ ) | 0.08 ( $\pm 0.001$ ) | 0.09 ( $\pm 0.005$ ) | 0.06 ( $\pm 0.003$ ) | 0.05 ( $\pm 0.010$ ) |
| T95pH3 | 0.27<br>( $\pm 0.040$ ) | 0.19 ( $\pm 0.020$ ) | 0.15 ( $\pm 0.015$ ) | 0.14 ( $\pm 0.039$ ) | 0.13 ( $\pm 0.020$ ) | 0.12 ( $\pm 0.022$ ) |
|        |                         | 0.11 ( $\pm 0.006$ ) | 0.08 ( $\pm 0.005$ ) | 0.11 ( $\pm 0.011$ ) | 0.05 ( $\pm 0.010$ ) | 0.05 ( $\pm 0.002$ ) |
| T95Dry | 0.25<br>( $\pm 0.012$ ) | -                    | -                    | -                    | -                    | -                    |
|        |                         | 0.30 ( $\pm 0.012$ ) | 0.33 ( $\pm 0.020$ ) | 0.32 ( $\pm 0.014$ ) | 0.34 ( $\pm 0.035$ ) | 0.35 ( $\pm 0.011$ ) |

**Table S2.** Water uptakes of the MEA frame films under two-factor, three-level conditions

| Sample | Initial weight (g) | After 30 min (g) | Water uptake 30 min (%)  | After 60 min (g) | Water uptake 60 min (%)  |
|--------|--------------------|------------------|--------------------------|------------------|--------------------------|
| T25pH7 | 0.1722             | 0.1760           | + 2.40<br>( $\pm 0.17$ ) | 0.1802           | + 4.42<br>( $\pm 0.21$ ) |
|        | 0.1677             | 0.1721           |                          | 0.1752           |                          |
|        | 0.1695             | 0.1735           |                          | 0.1765           |                          |
| T25pH5 | 0.1723             | 0.1776           | + 3.31<br>( $\pm 0.26$ ) | 0.1802           | + 4.43<br>( $\pm 0.18$ ) |
|        | 0.1725             | 0.1780           |                          | 0.1797           |                          |
|        | 0.1717             | 0.1780           |                          | 0.1795           |                          |
| T25pH3 | 0.1749             | 0.1820           | + 4.25<br>( $\pm 0.14$ ) | 0.1810           | + 4.88<br>( $\pm 1.00$ ) |
|        | 0.1678             | 0.1750           |                          | 0.1775           |                          |
|        | 0.1770             | 0.1848           |                          | 0.1865           |                          |
| T60pH7 | 0.1698             | 0.1770           | + 4.87<br>( $\pm 0.48$ ) | 0.1808           | + 6.46<br>( $\pm 0.89$ ) |
|        | 0.1699             | 0.1791           |                          | 0.1827           |                          |
|        | 0.1697             | 0.1781           |                          | 0.1788           |                          |
| T60pH5 | 0.1655             | 0.1791           | + 6.50<br>( $\pm 1.40$ ) | 0.1794           | + 7.34<br>( $\pm 0.75$ ) |
|        | 0.1651             | 0.1730           |                          | 0.1765           |                          |
|        | 0.1754             | 0.1868           |                          | 0.1872           |                          |
| T60pH3 | 0.1719             | 0.1843           | + 6.96<br>( $\pm 0.96$ ) | 0.1873           | + 7.20<br>( $\pm 1.46$ ) |
|        | 0.1750             | 0.1890           |                          | 0.1877           |                          |
|        | 0.1708             | 0.1805           |                          | 0.1800           |                          |
| T95pH7 | 0.1726             | 0.1828           | + 5.58<br>( $\pm 0.33$ ) | 0.1891           | + 9.15<br>( $\pm 0.32$ ) |
|        | 0.1737             | 0.1826           |                          | 0.1895           |                          |
|        | 0.1731             | 0.1830           |                          | 0.1883           |                          |
| T95pH5 | 0.1681             | 0.1824           | + 8.05<br>( $\pm 0.52$ ) | 0.1854           | + 9.62<br>( $\pm 0.84$ ) |
|        | 0.1678             | 0.1801           |                          | 0.1848           |                          |
|        | 0.1672             | 0.1811           |                          | 0.1813           |                          |
| T95pH3 | 0.1695             | 0.1861           | + 8.11<br>( $\pm 1.37$ ) | 0.1835           | + 9.60<br>( $\pm 1.33$ ) |
|        | 0.1664             | 0.1799           |                          | 0.1854           |                          |
|        | 0.1711             | 0.1821           |                          | 0.1867           |                          |

**Table S3.** Young's modulus and tensile strength of the membrane films after two-factor, three-level experiment

| Sample           | 504 h                 |                        |
|------------------|-----------------------|------------------------|
|                  | Young's Modulus (MPa) | Tensile Strength (MPa) |
| Initial membrane | 512.27 ( $\pm$ 16.25) | 49.13 ( $\pm$ 0.83)    |
| T25pH7           | 302.86 ( $\pm$ 33.23) | 48.74 ( $\pm$ 1.25)    |
| T25pH5           | 219.71 ( $\pm$ 14.02) | 47.28 ( $\pm$ 1.51)    |
| T25pH3           | 169.91 ( $\pm$ 16.27) | 47.08 ( $\pm$ 1.83)    |
| T60pH7           | 152.26 ( $\pm$ 15.99) | 46.87 ( $\pm$ 1.93)    |
| T60pH5           | 145.28 ( $\pm$ 15.34) | 46.70 ( $\pm$ 3.43)    |
| T60pH3           | 139.45 ( $\pm$ 15.22) | 46.37 ( $\pm$ 0.82)    |
| T95pH7           | 127.12 ( $\pm$ 14.02) | 44.27 ( $\pm$ 1.70)    |
| T95pH5           | 103.12 ( $\pm$ 20.19) | 40.50 ( $\pm$ 0.30)    |
| T95pH3           | 75.77 ( $\pm$ 29.04)  | 40.53 ( $\pm$ 2.14)    |
